# Supplementary material for: Proteomic Analysis of the Organ of Corti Using Nanoscale Liquid Chromatography Coupled with Tandem Mass Spectrometry
Source: MDPI journal article supplement (doi:10.3390/ijms13078171), 2012-07-02

# Proteomic Analysis of the Organ of Corti Using Nanoscale Liquid Chromatography Coupled with Tandem Mass Spectrometry

## Supplementary Material

**Figure S1.** (A) Representative base peak chromatography for peptides obtained with the nanoLC system coupled with LTQ-Orbitrap XL for MS/MS analysis. (B) MS/MS spectrum for a phosphopeptide HAFSPVASVESASGETLHSPK, which was reconciled as the triply charged peptide ion arising from alpha-2-HS-glycoprotein. The phosphorylation site is Ser-314.

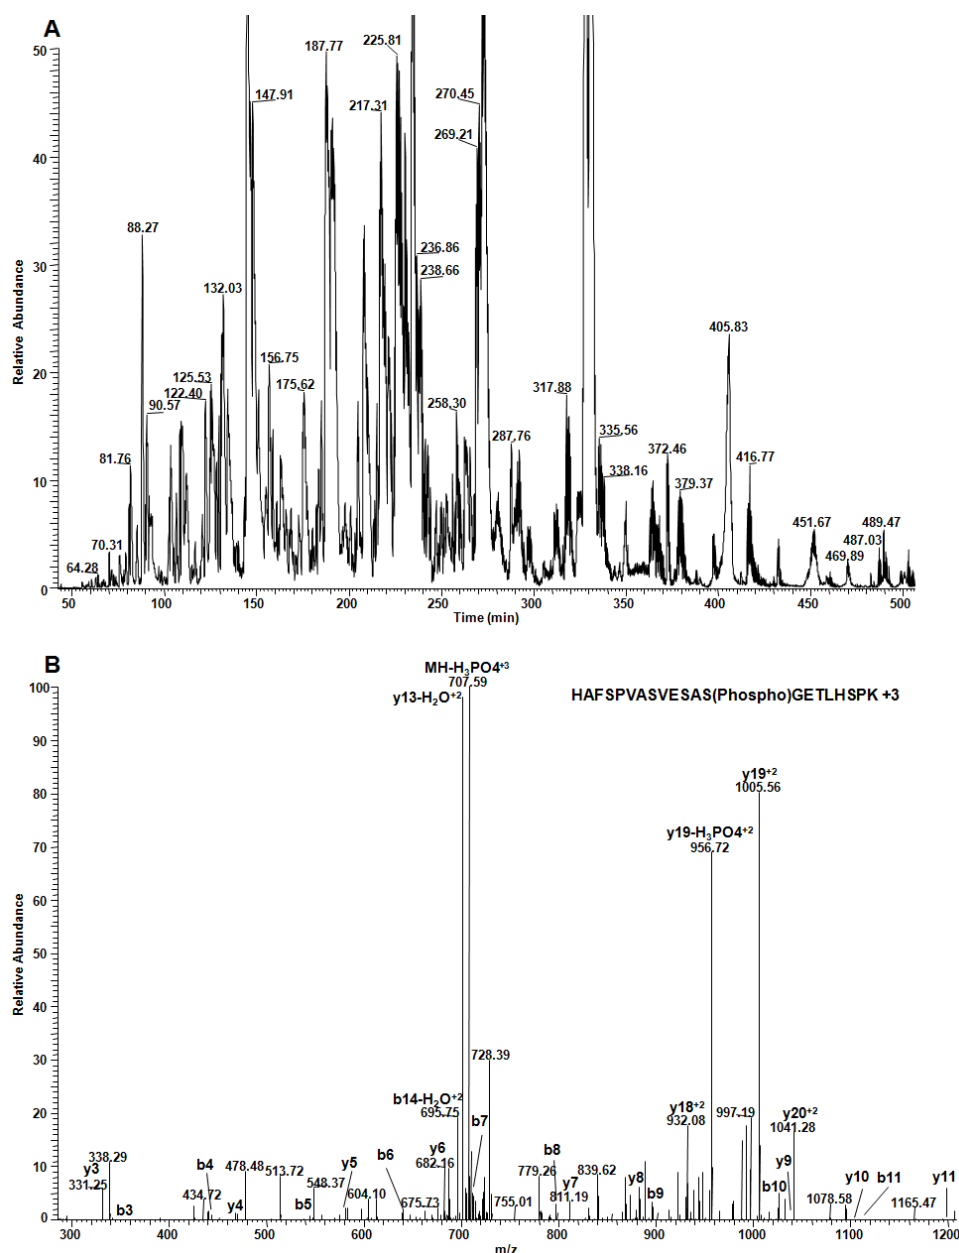

Supplement: s1 [file s1]
